# Supplementary material for: Staged versus immediate complete revascularization for non-culprit arteries in acute myocardial infarction: a post-hoc analysis of FRAME-AMI
Source: PubMed Central journal article supplement (PMC11669547; doi:10.3389/fcvm.2024.1475483), 2024-12-12
Supplement: Datasheet1.pdf [file Datasheet1.pdf]

## *Supplementary Material*

**Staged versus Immediate Complete Revascularization for Non-culprit Arteries in Acute Myocardial**

**Infarction:**

**A Post-hoc Analysis of FRAME-AMI**

On behalf of the FRAME-AMI investigators

## **Table of contents**

### **Supplementary Tables**

1. Baseline characteristics for varying complete revascularization timings (CR) in STEMI and NSTEMI
2. Hazard ratio of staged complete revascularization for outcomes, multivariable Cox-proportional Hazard Modelling, all patients with AMI
3. Supplementary Table 3. Results of Cox Proportional Hazard Modelling
4. Supplementary Table 4. Final models of OW-adjusted multivariable Cox proportional models for composite outcomes

### **Supplementary Figures**

1. Balancing using overlap weighting, all acute myocardial infarction (AMI)
2. Balancing using overlap weighting, ST segment elevation myocardial infarction (STEMI)
3. Balancing using overlap weighting, non-STEMI (NSTEMI)
4. Histogram for propensity score (A), and density plot describing overlap weighting in all patients (B, C)
5. Histogram for propensity score (A), and density plot describing overlap weighting in patients with ST-segment elevation myocardial infarction (B, C)
6. Histogram for propensity score (A), and density plot describing overlap weighting in patients with non-ST-segment elevation myocardial infarction (B, C)
7. Kaplan-Meier curve of all-cause death (A), myocardial infarction (MI) (B), and repeated revascularization (C) in patients with AMI with multivessel disease treated with immediate or staged PCI strategy for non-culprit artery(s).
8. Kaplan-Meier curve of all-cause death (A), MI (B), and repeated revascularization (C) in patients with STEMI with multivessel disease treated with immediate or staged PCI strategy for

non-culprit artery(s).

9. Kaplan-Meier curve of all-cause death (A), MI (B), and repeated revascularization (C) in patients with NSTEMI with multivessel disease treated with immediate or staged PCI strategy for non-culprit artery

| <b>Supplementary Table 1. Baseline characteristics in patients with STEMI and NSTEMI</b> |                      |                     |       |                       |                     |       |
|------------------------------------------------------------------------------------------|----------------------|---------------------|-------|-----------------------|---------------------|-------|
|                                                                                          | <b>STEMI (N=256)</b> |                     |       | <b>NSTEMI (N=293)</b> |                     |       |
|                                                                                          | Immediate (N=109)    | Staged (N=147)      | P     | Immediate (N=220)     | Staged (N=73)       | P     |
| Age                                                                                      | 63.0 [55.0;72.0]     | 62.0 [56.0;71.0]    | 0.858 | 63.0 [56.0;71.0]      | 61.0 [54.0;73.0]    | 0.556 |
| Male                                                                                     | 88 (80.7%)           | 131 (89.1%)         | 0.088 | 179 (81.4%)           | 65 (89.0%)          | 0.18  |
| BMI                                                                                      | 24.4 [22.2;26.4]     | 24.6 [23.0;26.9]    | 0.471 | 24.9 [22.9;26.6]      | 25.0 [22.6;26.6]    | 0.983 |
| SBP                                                                                      | 127.0 [113.0;147.0]  | 124.0 [106.0;142.0] | 0.237 | 130.0 [120.0;143.0]   | 126.0 [112.0;140.0] | 0.047 |
| DBP                                                                                      | 80.0 [67.0;90.0]     | 80.0 [64.0;90.0]    | 0.285 | 78.3 ± 13.2           | 74.9 ± 13.7         | 0.062 |
| HR                                                                                       | 78.4 ± 16.1          | 74.1 ± 17.2         | 0.043 | 75.0 [67.0;84.5]      | 76.0 [67.0;87.5]    | 0.452 |
| Hypertension                                                                             | 62 (56.9%)           | 77 (52.4%)          | 0.557 | 123 (55.9%)           | 34 (46.6%)          | 0.211 |
| DM                                                                                       | 38 (34.9%)           | 31 (21.1%)          | 0.021 | 82 (37.3%)            | 27 (37.0%)          | 1     |
| Hyperlipidemia                                                                           | 43 (39.4%)           | 58 (39.5%)          | 1     | 92 (41.8%)            | 27 (37.0%)          | 0.555 |
| Current smoker                                                                           | 39 (35.8%)           | 57 (38.8%)          | 0.72  | 68 (30.9%)            | 27 (37.0%)          | 0.414 |

|                             |                    |                    |       |                    |                    |       |
|-----------------------------|--------------------|--------------------|-------|--------------------|--------------------|-------|
| Family history of CAD       | 5 (4.6%)           | 8 (5.4%)           | 0.984 | 21 (9.5%)          | 5 (6.8%)           | 0.642 |
| CKD                         | 2 (1.8%)           | 2 (1.4%)           | 1     | 10 (4.5%)          | 2 (2.7%)           | 0.739 |
| Previous CVA                | 4 (3.7%)           | 5 (3.4%)           | 1     | 12 (5.5%)          | 3 (4.1%)           | 0.884 |
| Previous MI                 | 2 (1.8%)           | 4 (2.7%)           | 0.964 | 7 (3.2%)           | 0 (0.0%)           | 0.271 |
| Previous PCI                | 4 (3.7%)           | 11 (7.5%)          | 0.31  | 20 (9.1%)          | 1 (1.4%)           | 0.051 |
| Previous CHF                | 0 (0.0%)           | 0 (0.0%)           | 1     | 1 (0.5%)           | 0 (0.0%)           | 1     |
| Peripheral vascular disease | 1 (0.9%)           | 1 (0.7%)           | 1     | 4 (1.8%)           | 0 (0.0%)           | 0.563 |
| Hemoglobin                  | 14.5 [13.4;15.8]   | 14.7 [13.2;15.6]   | 0.973 | 14.3 [12.9;15.5]   | 14.3 [12.8;15.4]   | 0.698 |
| Creatinine                  | 0.9 [ 0.8; 1.1]    | 1.0 [ 0.8; 1.1]    | 0.388 | 0.9 [ 0.8; 1.0]    | 0.9 [ 0.8; 1.2]    | 0.281 |
| HDL                         | 42.0 [36.0;50.0]   | 40.5 [34.0;48.0]   | 0.115 | 40.8 [35.5;48.5]   | 41.0 [37.0;48.0]   | 0.728 |
| LDL                         | 123.0 [97.0;154.0] | 117.5 [94.5;142.0] | 0.259 | 121.8 [86.0;142.0] | 116.0 [73.0;136.0] | 0.452 |
| HbA1C                       | 6.0 [ 5.7; 7.0]    | 5.9 [ 5.5; 6.5]    | 0.201 | 6.3 [ 5.7; 7.1]    | 5.8 [ 5.6; 6.6]    | 0.069 |
| LVEF                        | 50.0 [43.0;55.8]   | 52.0 [45.0;57.0]   | 0.225 | 57.0 [50.0;63.2]   | 55.0 [48.0;63.2]   | 0.162 |

| Discharge medication                                                                          |             |             |       |             |             |       |
|-----------------------------------------------------------------------------------------------|-------------|-------------|-------|-------------|-------------|-------|
| Aspirin                                                                                       | 108 (99.1%) | 144 (98.0%) | 0.836 | 218 (99.1%) | 73 (100.0%) | 1     |
| Warfarin or NOAC                                                                              | 3 (2.8%)    | 6 (4.1%)    | 0.82  | 6 (2.7%)    | 3 (4.1%)    | 0.84  |
| clopidogrel                                                                                   | 28 (25.7%)  | 36 (24.5%)  | 0.942 | 62 (28.2%)  | 29 (39.7%)  | 0.089 |
| Ticagrelor                                                                                    | 53 (48.6%)  | 78 (53.1%)  | 0.565 | 93 (42.3%)  | 26 (35.6%)  | 0.387 |
| Prasugrel                                                                                     | 27 (24.8%)  | 32 (21.8%)  | 0.679 | 63 (28.6%)  | 17 (23.3%)  | 0.461 |
| Statin                                                                                        | 104 (95.4%) | 143 (97.3%) | 0.647 | 214 (97.3%) | 72 (98.6%)  | 0.829 |
| Beta blocker                                                                                  | 86 (78.9%)  | 118 (80.3%) | 0.91  | 170 (77.3%) | 48 (65.8%)  | 0.072 |
| ACE inhibitor or ARB                                                                          | 75 (68.8%)  | 97 (66.0%)  | 0.733 | 155 (70.5%) | 48 (65.8%)  | 0.543 |
| CCB                                                                                           | 14 (12.8%)  | 18 (12.2%)  | 1     | 48 (21.8%)  | 10 (13.7%)  | 0.181 |
| Values are mean $\pm$ SD or median [25 percentile, 75 percentiles] according to distribution. |             |             |       |             |             |       |

ACE=angiotensin converting enzyme; ARB=angiotensin receptor blocker; BNP=brain natriuretic peptide; BMI=body mass index;  
CABG=coronary artery bypass graft; CAD=coronary artery disease; CCB=calcium channel blocker; CHF=congestive heart failure;  
CKD=chronic kidney disease; CVA=cerebrovascular accident; DBP=diastolic blood pressure; DM=diabetes mellitus; ESRD=end-stage  
renal disease; HbA1C=hemoglobin A1C; HDL-C=high-density lipoprotein cholesterol; HR=heart rate; LDL-C=low-density lipoprotein  
cholesterol; LVEF=left ventricular ejection fraction; MI=myocardial infarction; NOAC=new oral anticoagulant; NSTEMI=non-ST segment  
elevation myocardial infarction; PCI=percutaneous coronary intervention; STEMI= ST segment elevation myocardial infarction

| <b>Supplementary Table 2. Procedural profiles and in-hospital complications in STEMI and NSTEMI patients</b> |                      |                  |       |                         |                     |       |
|--------------------------------------------------------------------------------------------------------------|----------------------|------------------|-------|-------------------------|---------------------|-------|
|                                                                                                              | <b>STEMI (N=256)</b> |                  |       | <b>NSTEMI (N=293)</b>   |                     |       |
|                                                                                                              | Immediate (N=109)    | Staged (N=147)   | p     | Immediate (N=220)       | Staged (N=73)       | p     |
| <b>STEMI</b>                                                                                                 |                      |                  |       |                         |                     |       |
| DBT (min)                                                                                                    | 72.5 [55.0;98.5]     | 68.0 [54.0;83.0] | 0.113 | 625.5<br>[219.0;1180.0] | 350.0 [167.0;869.0] | 0.001 |
| Culprit vessel                                                                                               | 0.002                |                  |       |                         |                     | 0.009 |
| LAD                                                                                                          | 55 (50.5%)           | 42 (28.6%)       |       | 78 (35.5%)              | 16 (21.9%)          |       |
| LCX                                                                                                          | 13 (11.9%)           | 22 (15.0%)       |       | 73 (33.2%)              | 20 (27.4%)          |       |
| RCA                                                                                                          | 41 (37.6%)           | 83 (56.5%)       |       | 69 (31.4%)              | 37 (50.7%)          |       |
| 3 vessel disease                                                                                             | 39 (35.8%)           | 71 (48.3%)       | 0.061 | 65 (29.5%)              | 36 (49.3%)          | 0.003 |
| Left main disease                                                                                            | 3 (2.8%)             | 7 (4.8%)         | 0.621 | 3 (1.4%)                | 4 (5.5%)            | 0.12  |
| Culprit lesion No.                                                                                           | 1.0 [ 1.0; 1.0]      | 1.0 [ 1.0; 1.0]  | 0.27  | 1.0 [ 1.0; 1.0]         | 1.0 [ 1.0; 1.0]     | 0.071 |



|                                     |                 |                 |       |                 |                 |       |
|-------------------------------------|-----------------|-----------------|-------|-----------------|-----------------|-------|
| Non-culprit lesion No.              | 1.0 [ 1.0; 2.0] | 1.0 [ 1.0; 2.0] | 0.031 | 1.0 [ 1.0; 1.0] | 1.0 [ 1.0; 2.0] | 0.002 |
| Transfemoral                        | 13 (11.9%)      | 38 (25.9%)      | 0.009 | 19 (8.6%)       | 18 (24.7%)      | 0.001 |
| Stent insertion for culprit lesion  | 108 (99.1%)     | 146 (99.3%)     | 1     | 214 (97.7%)     | 72 (98.6%)      | 0.367 |
| Gp IIb IIIA inhibitor               | 32 (29.4%)      | 41 (27.9%)      | 0.907 | 18 (8.2%)       | 12 (16.4%)      | 0.073 |
| Direct stenting for culprit artery  | 15 (13.8%)      | 11(7.5%)        | 0.151 | 22 (10.0%)      | 0 (0.0%)        | 0.011 |
| Image guided PCI for culprit artery | 16 (14.7%)      | 23 (15.6%)      | 0.97  | 66 (30.0%)      | 13 (17.8%)      | 0.06  |
| Culprit total No. of stents         | 1.3 ± 0.6       | 1.2 ± 0.4       | 0.214 | 1.2 ± 0.5       | 1.3 ± 0.6       | 0.264 |
| Culprit-mean stent size             | 3.1 ± 0.4       | 3.2 ± 0.5       | 0.299 | 3.1 ± 0.5       | 3.2 ± 0.4       | 0.332 |
| Culprit-mean stent length           | 30.0 ± 7.2      | 28.9 ± 7.6      | 0.249 | 27.3 ± 7.0      | 29.1 ± 7.2      | 0.057 |
| Culprit-total stent length          | 38.4 ± 20.2     | 34.6 ± 15.0     | 0.095 | 34.0 ± 15.6     | 38.8 ± 18.8     | 0.056 |
| Culprit-procedural success          | 109 (100.0%)    | 147 (100.0%)    | 1     | 219 (99.5%)     | 73 (100.0%)     | 1     |
| FFR guided                          | 55 (50.5%)      | 72 (49.0%)      | 0.914 | 115 (52.3%)     | 37 (50.7%)      | 0.92  |

|                                                        |             |              |       |              |             |        |
|--------------------------------------------------------|-------------|--------------|-------|--------------|-------------|--------|
| Any PCI for non-culprit artery(s)                      | 95 (87.2%)  | 126 (85.7%)  | 0.882 | 170 (77.3%)  | 59 (80.8%)  | 0.637  |
| Stent insertion for non-culprit                        | 93 (97.9%)  | 118 (93.7%)  | 0.295 | 163 (95.9%)  | 57 (96.6%)  | 1      |
| Image guided PCI for non-culprit <sup>a</sup>          | 22 (23.2%)  | 48 (38.1%)   | 0.027 | 44 (25.9%)   | 20 (33.9%)  | 0.311  |
| Non-culprit maximal diameter stenosis (%) <sup>*</sup> | 77.7 ± 11.9 | 77.9 ± 10.9  | 0.881 | 75.0 ± 11.0  | 75.7 ± 12.5 | 0.640  |
| Non-culprit total lesion length (mm) <sup>*</sup>      | 20.4 ± 10.3 | 23.6 ± 12.1  | 0.024 | 22.3 ± 12.4  | 25.7 ± 12.0 | 0.031  |
| Non-culprit FFR before PCI                             | 0.70 ± 0.1  | 0.70 ± 0.1   | 0.470 | 0.70 ± 0.1   | 0.70 ± 0.1  | 0.569  |
| Non-culprit total No. of stents                        | 1.1 ± 0.6   | 1.3 ± 0.8    | 0.023 | 1.0 ± 0.8    | 1.4 ± 1.0   | 0.001  |
| Non-culprit-mean stent size <sup>*</sup>               | 3.1 ± 0.5   | 3.0 ± 0.5    | 0.521 | 3.0 ± 0.4    | 3.0 ± 0.4   | 0.913  |
| Non-culprit-total stent length <sup>*</sup>            | 32.3 ± 15.0 | 40.8 ± 20.9  | 0.001 | 36.2 ± 22.3  | 50.1 ± 20.9 | <0.001 |
| Non-culprit-procedural success <sup>*</sup>            | 95 (100.0%) | 126 (100.0%) |       | 170 (100.0%) | 59 (100.0%) |        |
| Total No. of stents                                    | 2.3 ± 0.8   | 2.5 ± 1.0    | 0.289 | 2.2 ± 1.0    | 2.7 ± 1.2   | 0.001  |

|                           |                |                |       |                |                |       |
|---------------------------|----------------|----------------|-------|----------------|----------------|-------|
| Hospital stays            | 3.0 [2.0, 5.0] | 3.0 [2.0, 5.0] | 0.137 | 2.0 [1.0, 3.0] | 2.0 [1.0, 5.0] | 0.297 |
| In-hospital complications |                |                |       |                |                |       |
| Any complications         | 3 (2.8%)       | 8 (5.4%)       | 0.461 | 9 (4.1%)       | 6 (8.2%)       | 0.28  |
| CHF                       | 1 (0.9%)       | 0 (0.0%)       | 0.88  | 2 (0.9%)       | 1 (1.4%)       | 1     |
| Emergent PCI              | 0 (0%)         | 0 (0%)         |       | 0 (0%)         | 0 (0%)         |       |
| Emergent CABG             | 0 (0%)         | 0 (0%)         |       | 0 (0%)         | 0 (0%)         |       |
| Cardiogenic shock         | 0 (0.0%)       | 5 (3.4%)       | 0.137 | 1 (0.5%)       | 1 (1.4%)       | 0.998 |
| Contrast reaction         | 0 (0.0%)       | 0 (0.0%)       | 1     | 1 (0.5%)       | 0 (0.0%)       | 1     |
| Cardiac tamponade         | 0 (0.0%)       | 0 (0.0%)       |       | 0 (0.0%)       | 0 (0.0%)       |       |
| Bleeding at access site   | 1 (0.9%)       | 2 (1.4%)       | 1     | 1 (0.5%)       | 0 (0.0%)       | 1     |
| Access site occlusion     | 0 (0.0%)       | 0 (0.0%)       | 1     | 0 (0.0%)       | 1 (1.4%)       | 0.561 |
| Access site dissection    | 0 (0.0%)       | 0 (0.0%)       |       | 0 (0.0%)       | 0 (0.0%)       |       |
| Access site AV fistula    | 0 (0.0%)       | 0 (0.0%)       |       | 0 (0.0%)       | 0 (0.0%)       |       |

|                         |          |          |   |          |          |       |
|-------------------------|----------|----------|---|----------|----------|-------|
| Peripheral embolization | 0 (0.0%) | 0 (0.0%) | 1 | 0 (0.0%) | 1 (1.4%) | 0.561 |
| Pseudoaneurysm          | 0 (0.0%) | 0 (0.0%) |   | 0 (0.0%) | 0 (0.0%) |       |
| Cardiac arrest          | 0 (0.0%) | 1 (0.7%) | 1 | 0 (0.0%) | 1 (1.4%) | 0.561 |
| CIN                     | 0 (0.0%) | 0 (0.0%) | 1 | 1 (0.5%) | 1 (1.4%) | 0.998 |

Values are mean  $\pm$  SD or median [25 percentile, 75 percentiles] according to distribution.

\*Patients who did not have PCI for non-culprit artery(s) were excluded.

AV=arteriovenous; CABG=coronary artery bypass graft; CHF=congestive heart failure; CIN=contrast induced nephropathy; DBT=door to balloon time; FFR=fractional flow reserve; LAD=left anterior descending; LCX=left circumflex artery; NSTEMI=non-ST segment elevation myocardial infarction; PCI=percutaneous coronary intervention; STEMI= ST segment elevation myocardial infarction

| <b>Supplementary Table 3. Results of Cox Proportional Hazard Modelling</b> |                                             |                |                                               |                |                                            |                |
|----------------------------------------------------------------------------|---------------------------------------------|----------------|-----------------------------------------------|----------------|--------------------------------------------|----------------|
| <b>AMI</b>                                                                 |                                             |                |                                               |                |                                            |                |
|                                                                            | <b>Univariable HR of staged CR (95% CI)</b> | <b>P value</b> | <b>Multivariable HR of staged CR (95% CI)</b> | <b>P value</b> | <b>† Adjusted HR of staged CR (95% CI)</b> | <b>P value</b> |
| Composite outcome                                                          | 1.03 (0.60-1.77)                            | 0.905          | 0.97 (0.55-1.72)                              | 0.928          | 0.81 (0.43-1.53)                           | 0.528          |
| All-cause death                                                            | 1.05 (0.43-2.56)                            | 0.904          | 1.18 (0.56-2.48)                              | 0.66           | 1.01 (0.98-1.03)                           | 0.46           |
| Any AMI                                                                    | 0.76 (0.34-1.71)                            | 0.522          | 0.74 (0.35-1.59)                              | 0.45           | 1.01 (0.95-1.01)                           | 0.28           |
| Any RR                                                                     | 0.88 (0.39-1.99)                            | 0.766          | 1.04 (0.92-1.18)                              | 0.55           | 1.00 (0.96-1.02)                           | 0.55           |
| <b>STEMI</b>                                                               |                                             |                |                                               |                |                                            |                |
| Composite outcome                                                          | 0.84 (0.36-1.94)                            | 0.676          | 1.08(0.48-2.45)                               | 0.84           | 0.98 (0.93-1.03)                           | 0.49           |
| All-cause death                                                            | 3.76 (0.41-33.95)                           | 0.237          | 1.59(0.52-4.82)                               | 0.41           | 1.01 (0.99-1.03)                           | 0.17           |
| Any AMI                                                                    | 0.500(0.14-1.77)                            | 0.284          | 0.75(0.26-2.13)                               | 0.6            | 0.98 (0.94-1.02)                           | 0.34           |
| Any RR                                                                     | 0.42(0.12-1.41)                             | 0.163          | 0.62(0.21-1.85)                               | 0.4            | 0.97 (0.93-1.01)                           | 0.2            |

| <b>NSTEMI</b>                                                                                                                                                                                                                                                                                                                                                                                                            |                  |       |                  |      |                  |      |
|--------------------------------------------------------------------------------------------------------------------------------------------------------------------------------------------------------------------------------------------------------------------------------------------------------------------------------------------------------------------------------------------------------------------------|------------------|-------|------------------|------|------------------|------|
| Composite outcome                                                                                                                                                                                                                                                                                                                                                                                                        | 1.52 (0.74-3.11) | 0.255 | 1.00 (0.47-2.11) | 0.99 | 0.99 (0.91-1.07) | 0.84 |
| All-cause death                                                                                                                                                                                                                                                                                                                                                                                                          | 1.11 (0.35-3.48) | 0.849 | 1.01 (0.35-2.91) | 0.98 | 1.00 (0.94-1.08) | 0.8  |
| Any AMI                                                                                                                                                                                                                                                                                                                                                                                                                  | 1.31 (0.46-3.72) | 0.613 | 1.07 (0.39-2.93) | 0.89 | 0.97 (0.93-1.02) | 0.37 |
| Any RR                                                                                                                                                                                                                                                                                                                                                                                                                   | 1.85 (0.61-5.56) | 0.272 | 0.95 (0.31-2.09) | 0.94 | 0.99 (0.94-1.04) | 0.79 |
| <p>* Composite outcome = all-cause death + myocardial infarction (including periprocedural MI) + any repeated revascularization</p> <p>† Overlap weighting adjusted multivariable analysis</p> <p>AMI=acute myocardial infarction; HR=hazard ratio; MI=myocardial infarction; NSTEMI=non-ST segment elevation myocardial infarction; RR=repeated revascularization; STEMI=ST segment elevation myocardial infarction</p> |                  |       |                  |      |                  |      |

| AMI               | Univariate       | P value | Multivariate     | P value | † Adjusted HR of staged CR (95% CI) | P value |
|-------------------|------------------|---------|------------------|---------|-------------------------------------|---------|
| Composite outcome | 1.03 (0.60-1.77) | 0.905   | 0.97 (0.55-1.72) | 0.928   | 0.81 (0.43-1.53)                    | 0.528   |
| All-cause death   | 1.05 (0.43-2.56) | 0.904   | 1.18 (0.56-2.48) | 0.66    | 1.01 (0.98-1.03)                    | 0.46    |
| Any AMI           | 0.76 (0.34-1.71) | 0.522   | 0.74 (0.35-1.59) | 0.45    | 1.01 (0.95-1.01)                    | 0.28    |

|                   |                   |       |                  |      |                  |      |
|-------------------|-------------------|-------|------------------|------|------------------|------|
| Any RR            | 0.88 (0.39-1.99)  | 0.766 | 1.04 (0.92-1.18) | 0.55 | 1.00 (0.96-1.02) | 0.55 |
| STEMI             |                   |       |                  |      |                  |      |
| Composite outcome | 0.84 (0.36-1.94)  | 0.676 | 1.08(0.48-2.45)  | 0.84 | 0.98 (0.93-1.03) | 0.49 |
| All-cause death   | 3.76 (0.41-33.95) | 0.237 | 1.59(0.52-4.82)  | 0.41 | 1.01 (0.99-1.03) | 0.17 |
| Any AMI           | 0.500(0.14-1.77)  | 0.284 | 0.75(0.26-2.13)  | 0.6  | 0.98 (0.94-1.02) | 0.34 |
| Any RR            | 0.42(0.12-1.41)   | 0.163 | 0.62(0.21-1.85)  | 0.4  | 0.97 (0.93-1.01) | 0.2  |
| NSTEMI            |                   |       |                  |      |                  |      |
| Composite outcome | 1.52 (0.74-3.11)  | 0.255 | 1.00 (0.47-2.11) | 0.99 | 0.99 (0.91-1.07) | 0.84 |
| All-cause death   | 1.11 (0.35-3.48)  | 0.849 | 1.01 (0.35-2.91) | 0.98 | 1.00 (0.94-1.08) | 0.8  |
| Any AMI           | 1.31 (0.46-3.72)  | 0.613 | 1.07 (0.39-2.93) | 0.89 | 0.97 (0.93-1.02) | 0.37 |
| Any RR            | 1.85 (0.61-5.56)  | 0.272 | 0.95 (0.31-2.09) | 0.94 | 0.99 (0.94-1.04) | 0.79 |

| <b>Supplementary Table 4. Final models of OW-adjusted multivariable Cox proportional models for composite outcome</b> |                                     |         |
|-----------------------------------------------------------------------------------------------------------------------|-------------------------------------|---------|
| AMI                                                                                                                   |                                     |         |
|                                                                                                                       | † Adjusted HR of staged CR (95% CI) | P value |
| Staged PCI                                                                                                            | 0.81 (0.43-1.53)                    | 0.528   |
| Age≥65                                                                                                                | 1.34 (0.65-2.59)                    | 0.382   |
| STEMI                                                                                                                 | 0.56 (0.31-1.01)                    | 0.054   |
| FFR guidance                                                                                                          | 0.26 (0.14-0.51)                    | <0.001  |
| Diabetes                                                                                                              | 1.95 (1.00-3.77)                    | 0.047   |
| CKD                                                                                                                   | 1.11 (0.26-4.62)                    | 0.879   |
| LVEF                                                                                                                  | 0.95 (0.92-0.98)                    | 0.001   |
| Left main disease                                                                                                     | 1.85 (0.36-9.43)                    | 0.456   |
| 3-vessel disease                                                                                                      | 1.33 (0.74-2.39)                    | 0.325   |
| STEMI                                                                                                                 |                                     |         |
| Staged PCI                                                                                                            | 0.98 (0.93-1.03)                    | 0.49    |
| Age≥65                                                                                                                | 1.02 (0.97-1.08)                    | 0.36    |
| FFR guidance                                                                                                          | 0.95(0.91-1.00)                     | 0.1     |
| Diabetes                                                                                                              | 1.04 (0.97-1.10)                    | 0.2     |
| LVEF                                                                                                                  | 0.99 (0.992-0.999)                  | 0.011   |
| 3-vessel disease                                                                                                      | 1.01 (0.96-1.06)                    | 0.58    |
| NSTMI                                                                                                                 |                                     |         |



|                                                                                                                                                                                                                                                                                                                                                          |                  |       |
|----------------------------------------------------------------------------------------------------------------------------------------------------------------------------------------------------------------------------------------------------------------------------------------------------------------------------------------------------------|------------------|-------|
| Staged PCI                                                                                                                                                                                                                                                                                                                                               | 0.99 (0.91-1.07) | 0.84  |
| Age $\geq$ 65                                                                                                                                                                                                                                                                                                                                            | 1.06 (1.00-1.13) | 0.45  |
| FFR guidance                                                                                                                                                                                                                                                                                                                                             | 0.90 (0.84-0.96) | 0.001 |
| Diabetes                                                                                                                                                                                                                                                                                                                                                 | 1.06 (0.99-1.14) | 0.058 |
| CKD                                                                                                                                                                                                                                                                                                                                                      | 1.12 (0.93-1.36) | 0.22  |
| LVEF                                                                                                                                                                                                                                                                                                                                                     | 0.99 (0.99-1.00) | 0.059 |
| 3-vessel disease                                                                                                                                                                                                                                                                                                                                         | 1.03 (0.96-1.10) | 0.34  |
| <p>AMI=acute myocardial infarction; CI=confidence interval; CKD=chronic kidney disease; FFR=fractional flow reserve; HR=hazard ratio; LVEF=left ventricular ejection fraction; NSTEMI=non-ST segment elevation myocardial infarction; OW=overlap weighting; PCI=percutaneous coronary intervention; STEMI=ST segment elevation myocardial infarction</p> |                  |       |

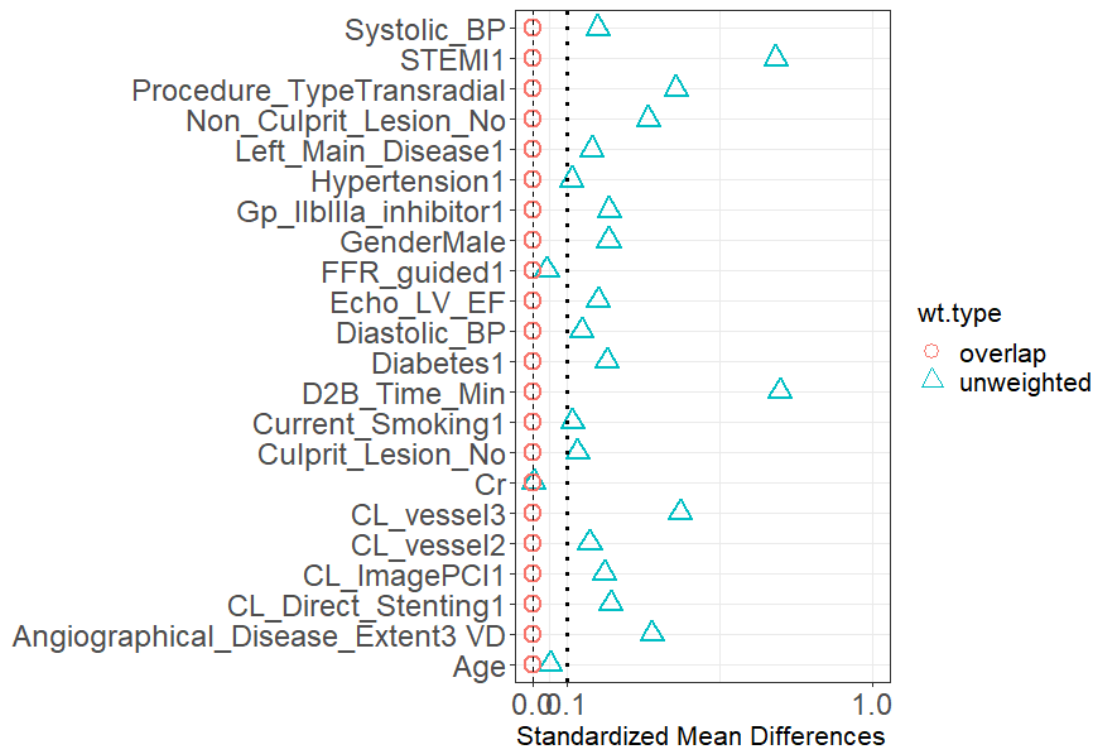

**Supplementary Figure 1.** Balancing before and after weighting in all acute myocardial infarction (AMI).

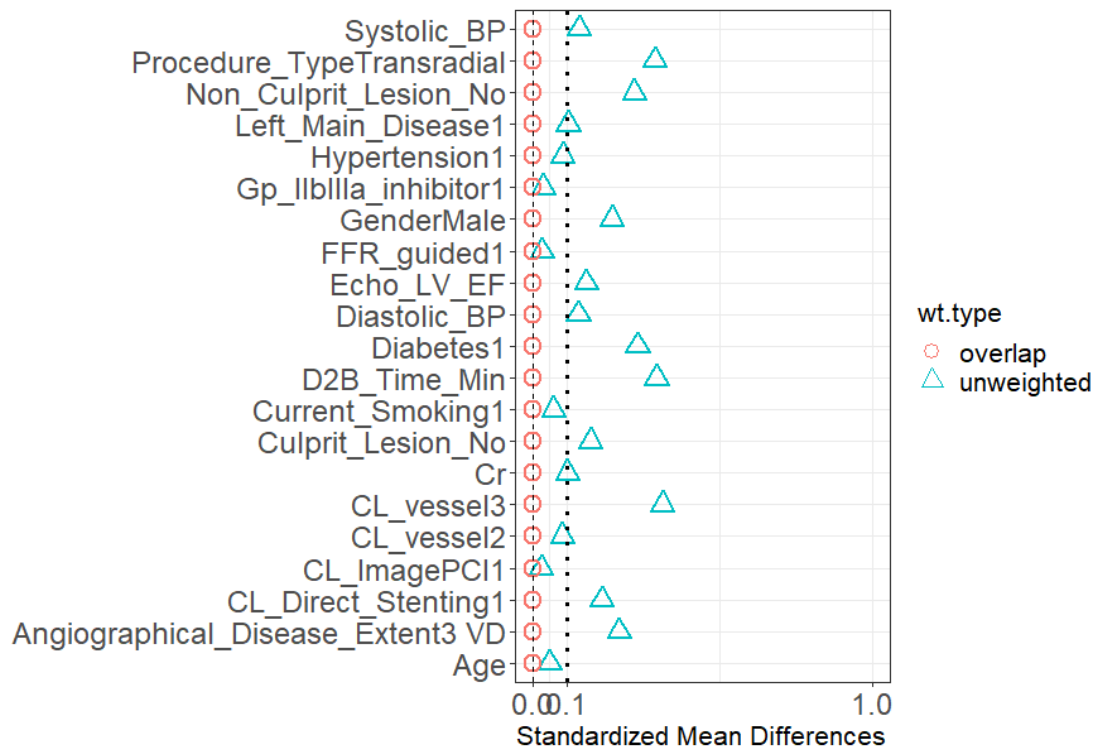

**Supplementary Figure 2.** Balancing before and after weighting in ST segment elevation myocardial infarction (STEMI).

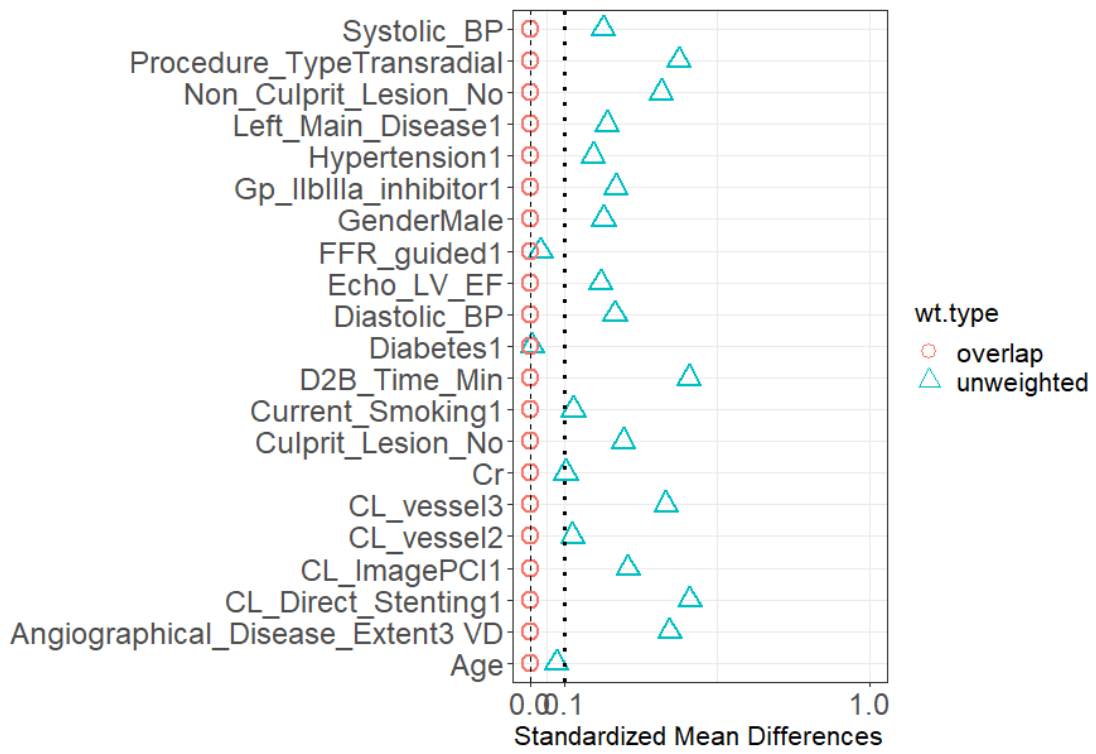

**Supplementary Figure 3.** Balancing before and after weighting in non-ST-segment elevation myocardial infarction (NSTEMI)

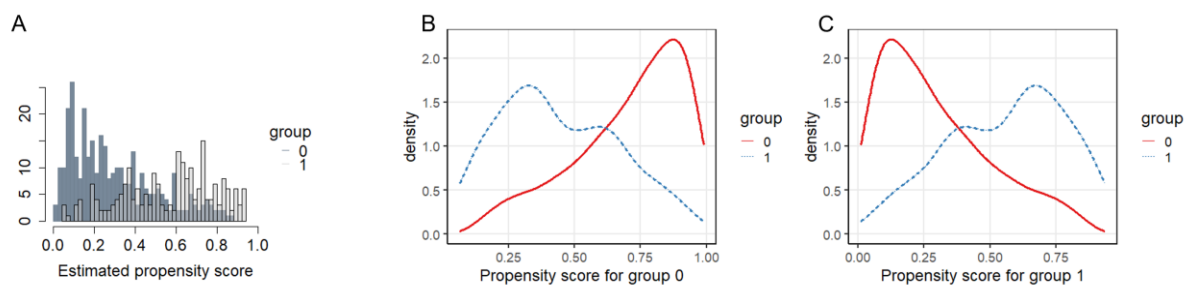

**Supplementary Figure 4.** Histogram for propensity score (A), and density plot describing overlap weighting in all patients (B, C)

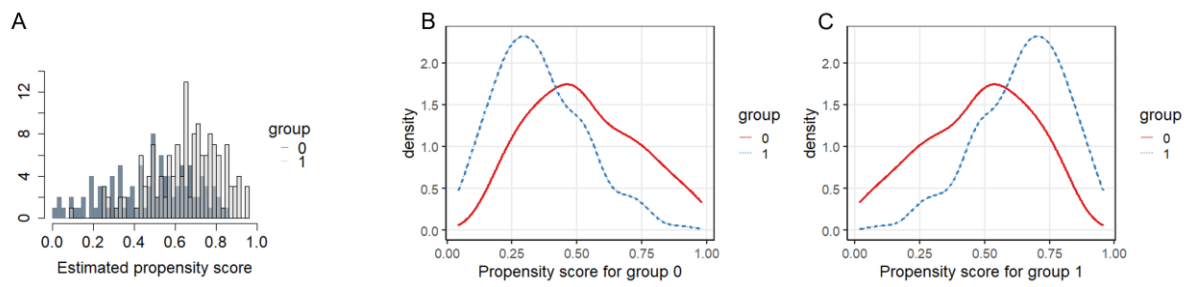

**Supplementary Figure 5.** Histogram for propensity score (A), and density plot describing overlap weighting in patients with ST-segment elevation myocardial infarction (B, C)

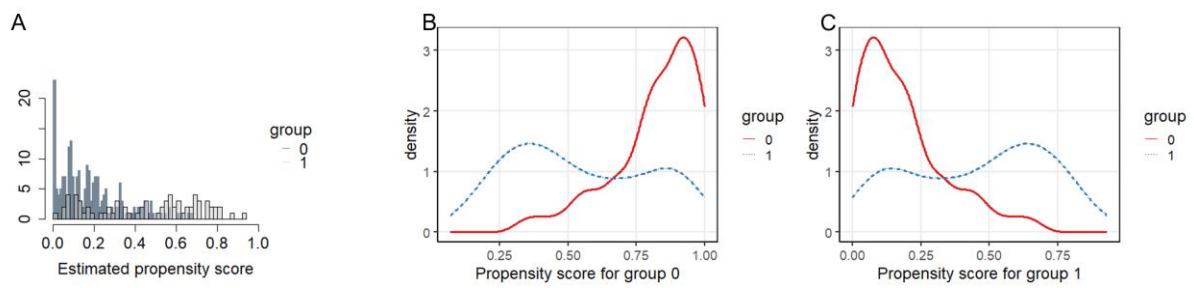

**Supplementary Figure 6.** Histogram for propensity score (A), and density plot describing overlap weighting in patients with non-ST-segment elevation myocardial infarction (B, C)

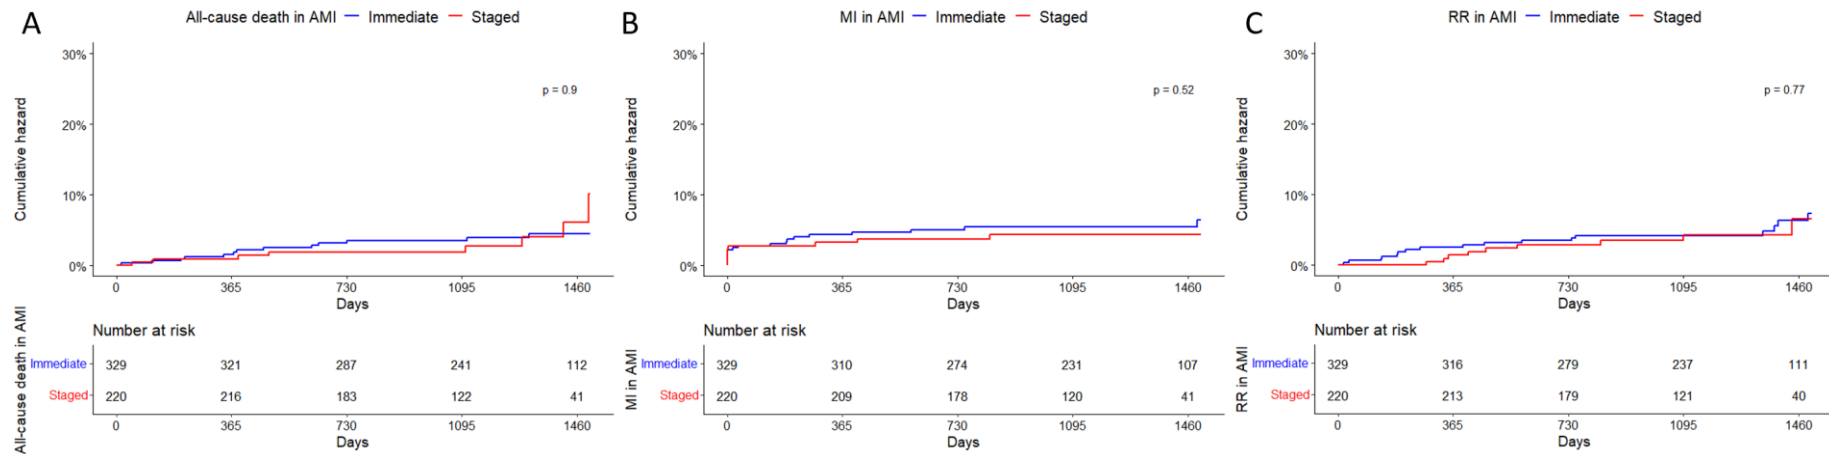

**Supplementary Figure 7.** Kaplan-Meier curve of all-cause death (A), MI (B), and repeated revascularization (C) in patients with AMI with multivessel disease treated with immediate or staged PCI strategy for non-culprit artery(s).

AMI=acute myocardial infarction; CI= confidence interval; HR= hazard ratio; MI=myocardial infarction; POCO=patient-oriented composite outcome; RR=repeated revascularization



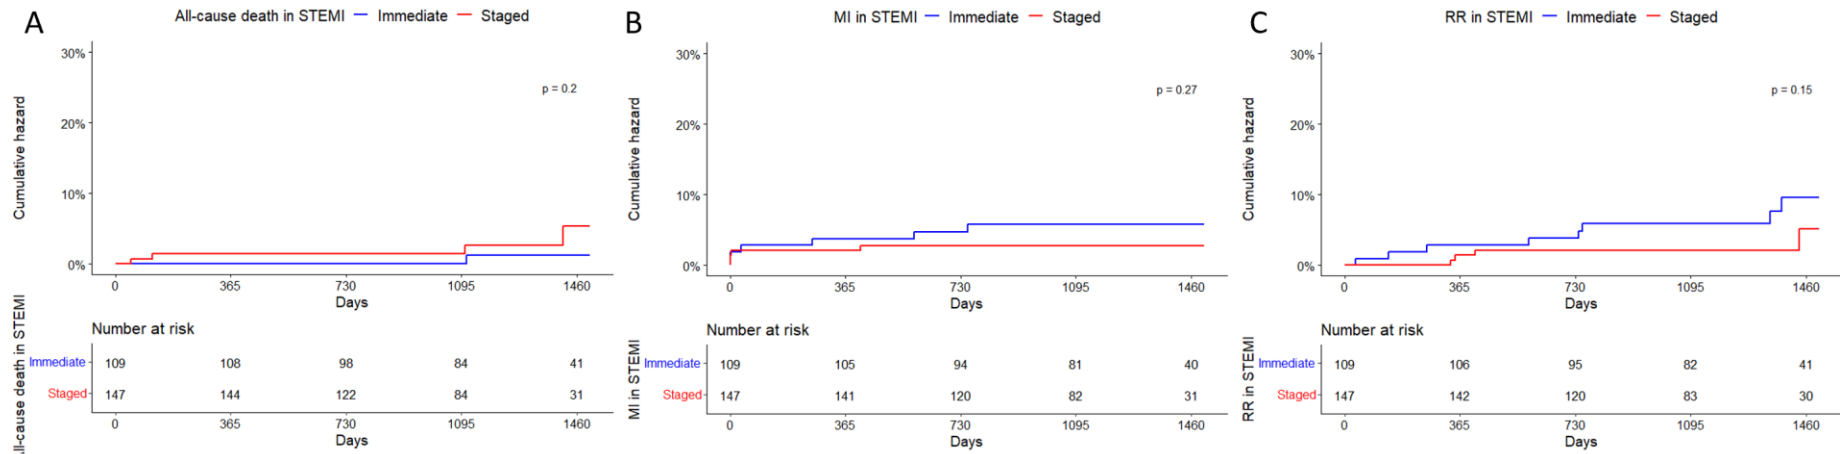

**Supplementary Figure 8.** Kaplan-Meier curve of all-cause death (A), MI (B), and repeated revascularization (C) in patients with STEMI with multivessel disease treated with immediate or staged PCI strategy for non-culprit artery(s).

AMI=acute myocardial infarction; CI= confidence interval; HR= hazard ratio; MI=myocardial infarction; POCO=patient-oriented composite outcome; RR=repeated revascularization; STEMI= ST segment elevation myocardial infarction

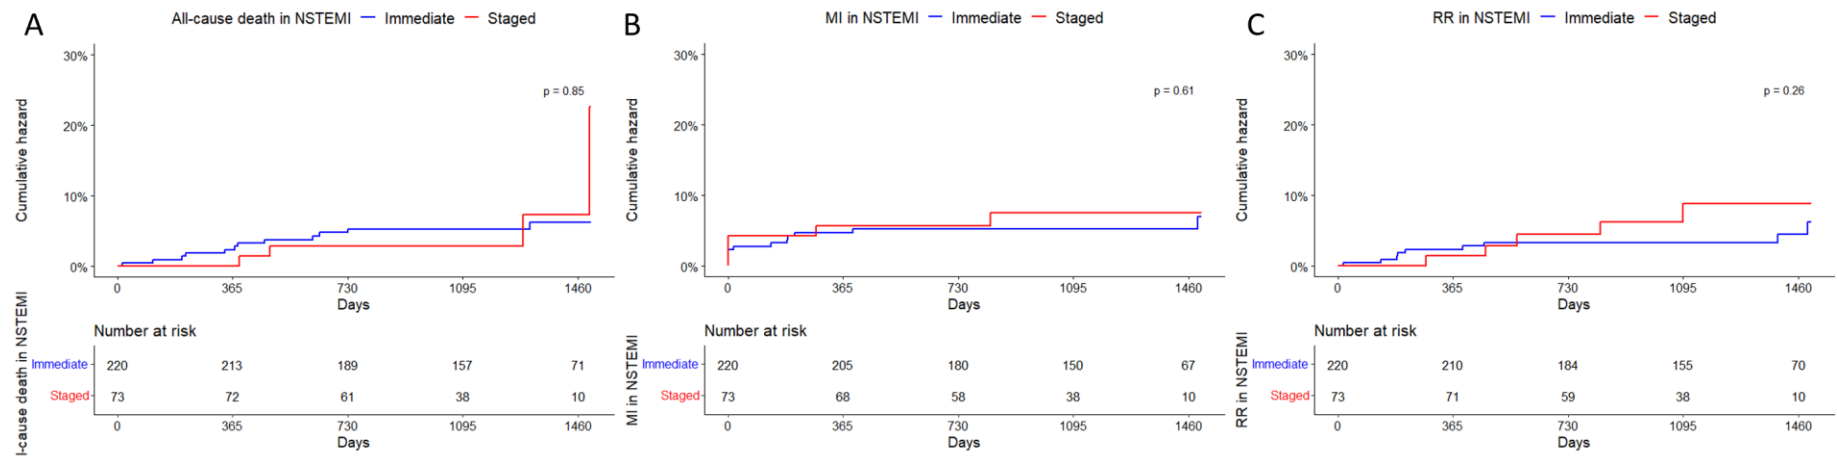

**Supplementary Figure 9.** Kaplan-Meier curve of all-cause death (A), MI (B), and repeated revascularization (C) in patients with NSTEMI with multivessel disease treated with immediate or staged PCI strategy for non-culprit artery(s).

AMI=acute myocardial infarction; CI= confidence interval; HR= hazard ratio; MI=myocardial infarction; NSTEMI= non-ST segment elevation myocardial infarction; POCO=patient-oriented composite outcome; RR=repeated revascularization.
